# Supplementary material
Source: PubMed Central journal article supplement (PMC6035739)
Supplement: mmc1.pdf [file mmc1.pdf]

**YMTHE, Volume 26**

## **Supplemental Information**

### **Therapeutic Benefit of Autophagy**

### **Modulation in Pompe Disease**

**Jeong-A Lim, Baodong Sun, Rosa Puertollano, and Nina Raben**

**Figure S1**

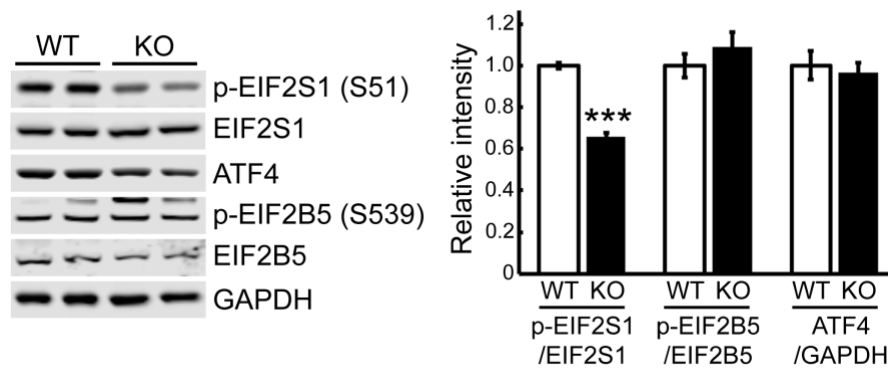

**Decreased levels of phosphorylated EIF2S1 (p-EIF2S1<sup>S51</sup>) in muscle of the KO mice.**

Western blot analysis of muscle lysates from WT and KO mice with the indicated antibodies. The levels of ATF4 (n=5) and p-EIF2B/EIF2B5 ratio (n=6) are not altered in the KO muscle, but the level of p-EIF2S1<sup>S51</sup> (n=6) is significantly decreased in the diseased muscle compared to the WT control. When EIF2S1 is less phosphorylated, it cannot inhibit the guanine nucleotide exchange factor EIF2B5, thus allowing the recycling of EIF2S1 between successive rounds of protein synthesis. A combination of decreased phosphorylation of EIF2S1 without changes in the EIF2B levels results in the upregulation of the overall rate of protein synthesis in the KO muscle. Graph represent mean  $\pm$  SE. \*\*\* $P < 0.001$ . Student's t-test.

**Figure S2**

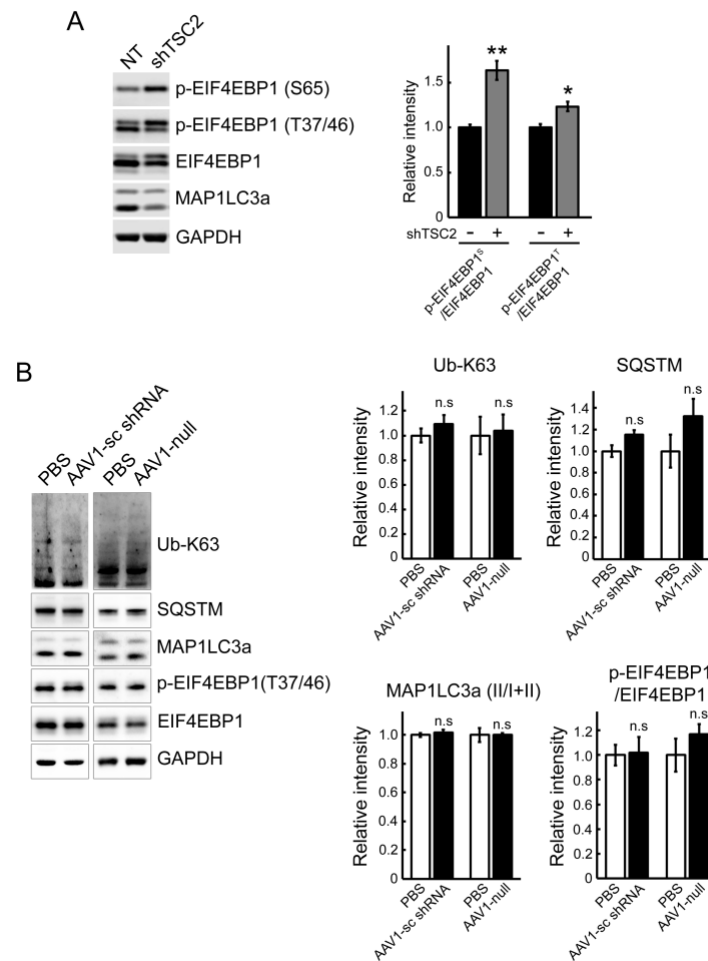

**Effects of AAV-mediated TSC2 inhibition on mTOR and autophagy in muscle of the KO mice.**

**A.** Representative image of western blot analysis of whole muscle lysates from sham-treated (NT) left gastrocnemius and AAV1-shRNA-TSC2 (shTSC2)-infected right gastrocnemius muscle from KO mice with indicated antibodies. Increased phosphorylation of a downstream mTOR target, EIF4EBP1, and a decrease in the autophagosomal marker MAP1LC3a-II are observed following TSC knockdown (consistent with our previously reported data<sup>1</sup>). **B.** Western blot analysis of muscle lysates from PBS-treated and AAV1-null and AAV1-scrambled shRNA (AAV1-sc shRNA)-infected KO mice with the indicated antibodies. 3-month-old KO mice were injected with a total dose of  $10^{11}$  GC of AAV1-sc shRNA or AAV1-null into three sites of the right gastrocnemius muscle; PBS was injected into the contralateral muscle. Animals were sacrificed 6 weeks after the procedure. White part of gastrocnemius muscle was used for western blots. GAPDH was used as a loading control. No changes in the levels of Ub-proteins, SQSTM/p62, MAP1LC3a or EIF4EBP1 were seen following AAV1-null or AAV1-sc-shRNA injections. Graphs represent mean  $\pm$  SE.  $n=3$ ; \* $P < 0.05$ , \*\* $P < 0.01$ . n.s.: not significant. Student's t-test.

1. Lim, JA, Li, L, Shiriha, OS, Trudeau, KM, Puertollano, R, and Raben, N (2017). Modulation of mTOR signaling as a strategy for the treatment of Pompe disease. *EMBO Mol Med.* 9(3):353-370.

**Figure S3**

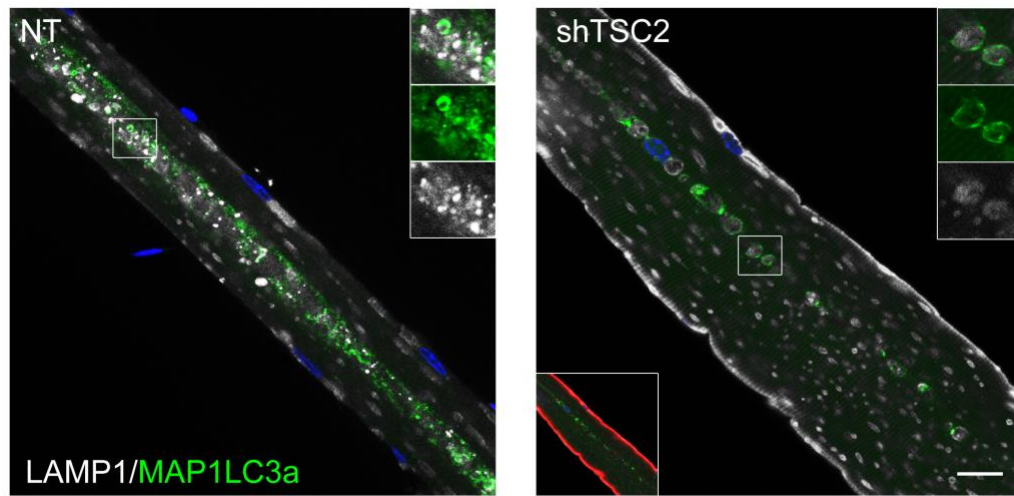

**Efficient lysosomal-autophagosomal fusion in muscle of the KO mice following TSC2 knockdown.**

Immunostaining of sham-infected (NT; left) and AAV1-RFP-shTSC (shTSC2; right)-infected single fibers from GFP-LC3:KO mice with anti-LC3 antibody (MAP1LC3a; green) and anti-LAMP1 (white) antibodies. The experiments were performed in GFP-LC3:KO, in which autophagosomes are labeled with GFP-LC3. 3-month-old mice were injected with AAV1-RFP-shRNA TSC2 vector preparation into the right gastrocnemius muscle; PBS was injected into the contralateral muscle. Animals were sacrificed 6 weeks after the procedure. White part of gastrocnemius muscle was used for analysis. A typical autophagic buildup is seen in the sham-infected fiber: the buildup occupies a sizeable portion of the fiber, and the colocalization of LC3- and LAMP1-positive structures are observed only occasionally. In contrast, the infected fiber (red) is largely free from typical buildup, and the ring-shaped MAP1LC3a-positive autophagosomes in the core of the fiber colocalize with LAMP1-positive lysosomes. Bar: 20  $\mu$ m

**Figure S4**

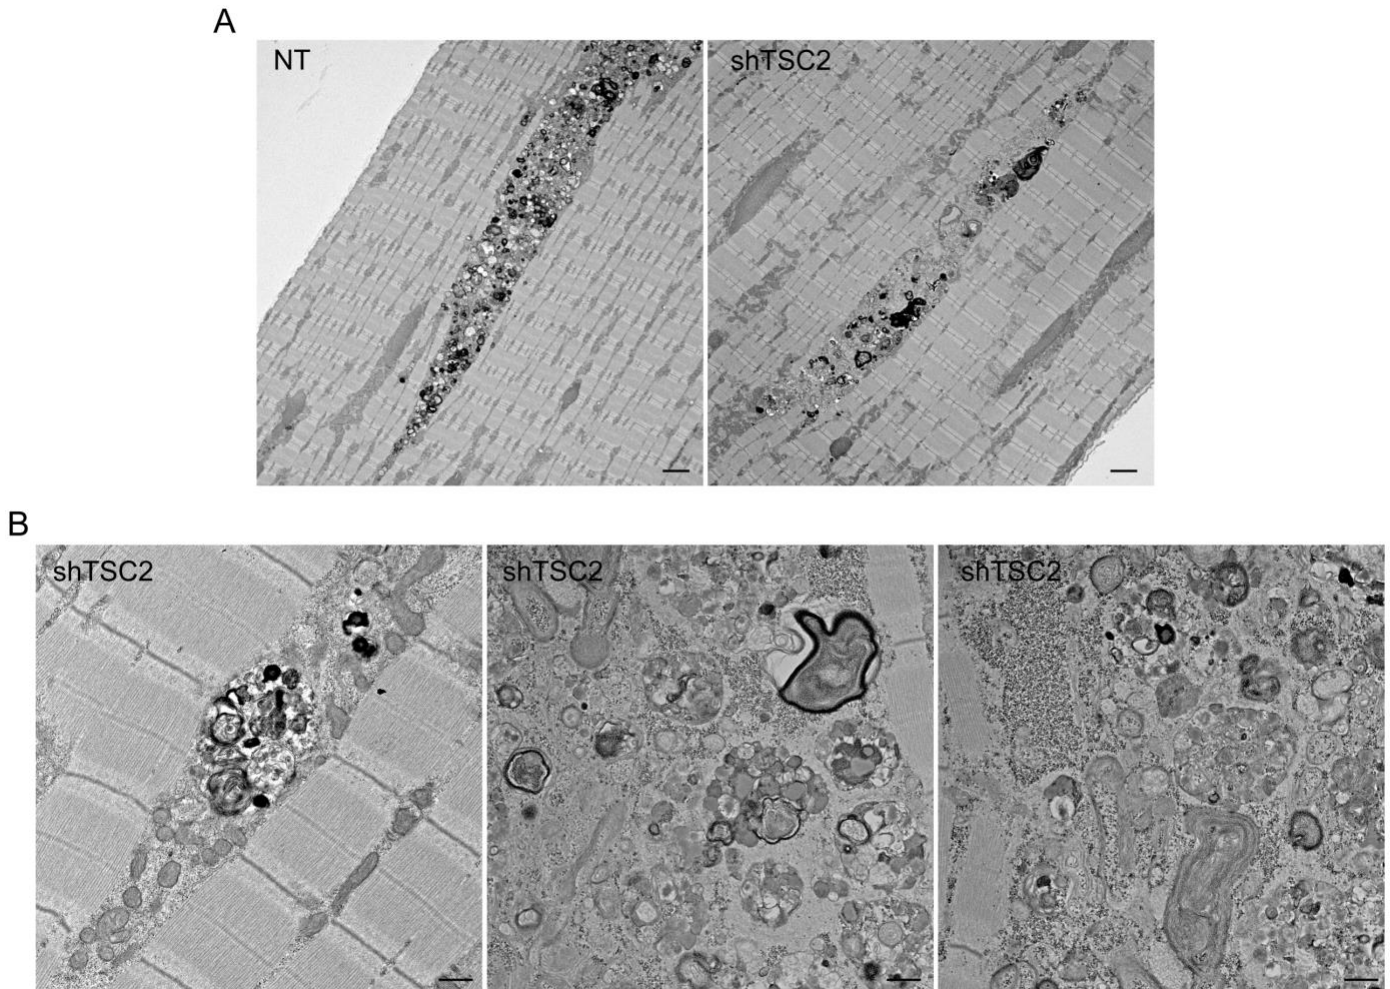

**Effect of AAV-mediated TSC2 inhibition on autophagic buildup in muscle of the KO mice.**

Additional electron micrograph images of sham-treated and AAV-shTSC-infected (shTSC2) muscle of the KO mice (see Figure 3B in the main text) showing reduced total area of the autophagic buildup following TSC knockdown. **A.** Bar: 2  $\mu$ m. A higher magnification images (lower panels) of the AAV-shTSC-infected KO muscle show dispersed clusters of vesicles separated by vesicle-free areas. **B.** Bar: 500 nm. 3-month-old KO mice were injected with AAV1- shTSC into three sites of the right gastrocnemius muscle (shTSC2); PBS was injected into the contralateral muscle. Animals were sacrificed 5.5 weeks after the procedure. White part of gastrocnemius muscle was used for analysis.

**Figure S5**

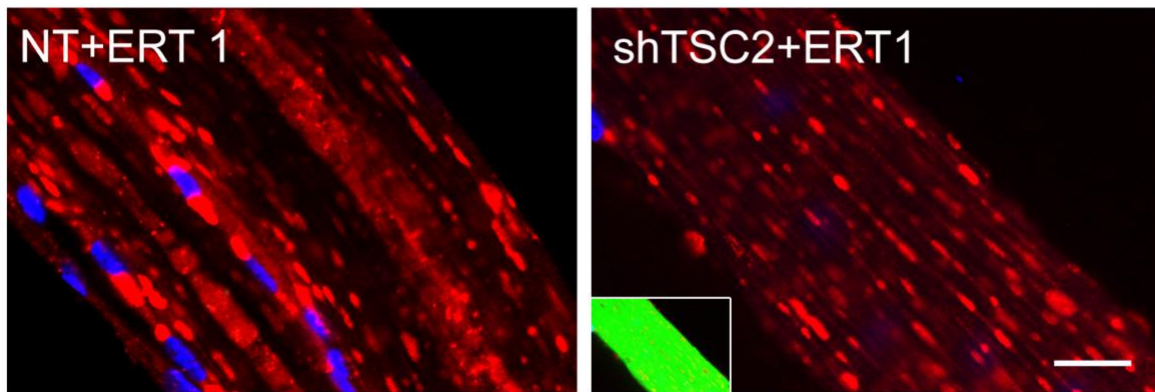

**Effect of ERT in skeletal muscle of KO mice following TSC knockdown.**

4-month-old KO mice were infected with AAV1-GFP-shRNA TSC2 vector preparation into the right gastrocnemius muscle; PBS was injected into the contralateral muscle; after 4 weeks, animals received a single i.v. injections of rhGAA (at a dose of 100 mg/kg); the mice were sacrificed 5 days after the drug injection. Immunostaining of single fibers from sham-infected (NT+ERT1; left) and AAV1-GFP-shRNA TSC2-infected (shTSC2+ERT1; green; right) muscle with LAMP1. Comparison of the two panels shows the absence of autophagic buildup and shrinking of lysosomes following TSC knockdown. Bar: 20  $\mu$ m.

## **Supplemental Videos**

**Supplemental video 1.** mCherry-LAMP-transfected fiber derived from a GFP-LC3:KO mouse.

Time-lapse confocal microscopy images were taken every 5 minutes. There is little (if any) interaction between lysosomes (red) and autophagosomes (green).

**Supplemental video 2.** mCherry-LAMP-transfected fiber derived from a GFP-LC3:KO mouse; the fiber was cultured in the presence of bvPLA2 (10  $\mu$ g/mL). Time-lapse confocal microscopy images were taken every 5 minutes. PLA2 stimulates the fusion between autophagosomes and lysosomes.

**Table S1. Ubiquitin-related upregulated genes**

| Gene Symbol | Name                                                        | Transcript   | p-value | Adjusted p-value (q-value) | FC    |
|-------------|-------------------------------------------------------------|--------------|---------|----------------------------|-------|
| Neur11a     | neuralized E3 ubiquitin protein ligase 1A                   | NM_021360    | 2E-05   | 6.21E-04                   | 38.53 |
| Tspo        | translocator protein                                        | NM_009775    | 4E-08   | 1.40E-05                   | 7.99  |
| Tnfaip3     | tumor necrosis factor, alpha-induced protein 3              | NM_009397    | 0.0026  | 1.73E-02                   | 4.39  |
| Tnfaip3     | tumor necrosis factor, alpha-induced protein 3              | NM_001166402 | 7E-05   | 1.46E-03                   | 7.26  |
| Faap20      | Fanconi anemia core complex associated protein 20           | NM_001190445 | 0.0011  | 8.89E-03                   | 6.91  |
| Park2       | Parkinson disease (autosomal recessive, juvenile) 2, parkin | NM_016694    | 8E-10   | 1.52E-06                   | 6.33  |
| Fbxo39      | F-box protein 39                                            | NM_001037713 | 0.0005  | 4.92E-03                   | 6.31  |
| Fbxl22      | F-box and leucine-rich repeat protein 22                    | NM_175206    | 1E-05   | 4.00E-04                   | 4.85  |
| Cd300lh     | CD300 antigen like family member H                          | NM_199201    | 0.0006  | 6.14E-03                   | 4.67  |
| Cdkn1a      | cyclin-dependent kinase inhibitor 1A (P21)                  | NM_007669    | 0.0002  | 2.42E-03                   | 4.52  |
| Uchl1       | ubiquitin carboxy-terminal hydrolase L1                     | NM_011670    | 1E-04   | 1.77E-03                   | 3.64  |
| Otub2       | OTU domain, ubiquitin aldehyde binding 2                    | NR_033587    | 0.0203  | 7.51E-02                   | 3.24  |
| Klhl40      | kelch-like 40                                               | NM_028202    | 1E-06   | 1.15E-04                   | 2.80  |
| Usp20       | ubiquitin specific peptidase 20                             | NM_028846    | 2E-07   | 3.74E-05                   | 2.65  |
| Dcaf4       | DDB1 and CUL4 associated factor 4                           | NM_001165256 | 0.0082  | 3.93E-02                   | 2.61  |
| Map1lc3a    | microtubule-associated protein 1 light chain 3 alpha        | NM_025735    | 7E-07   | 7.71E-05                   | 2.59  |
| Trp53       | transformation related protein 53                           | NM_001127233 | 0.0113  | 4.98E-02                   | 2.59  |
| Tnfr1       | TNFAIP3 interacting protein 1                               | NM_001199276 | 0.0012  | 9.50E-03                   | 2.57  |
| H2-Ab1      | histocompatibility 2, class II antigen A, beta 1            | NM_207105    | 3E-05   | 7.72E-04                   | 2.55  |
| Zfand2a     | zinc finger, AN1-type domain 2A                             | NM_133349    | 0.0008  | 7.02E-03                   | 2.54  |
| Trim72      | tripartite motif-containing 72                              | NM_001079932 | 2E-07   | 3.90E-05                   | 2.52  |

**Table S2. Proteasome-related upregulated genes**

| Input   | Name                                                        | Transcript   | p-value  | Adjusted p-value (q-value) | FC   |
|---------|-------------------------------------------------------------|--------------|----------|----------------------------|------|
| Park2   | Parkinson disease (autosomal recessive, juvenile) 2, parkin | NM_016694    | 7.94E-10 | 1.52E-06                   | 6.33 |
| Xaf1    | F-box protein 39                                            | NM_001037713 | 0.000462 | 4.92E-03                   | 6.31 |
| Fbxl22  | F-box and leucine-rich repeat protein 22                    | NM_175206    | 9.51E-06 | 4.00E-04                   | 4.85 |
| Kbtbd5  | kelch-like 40                                               | NM_028202    | 1.31E-06 | 1.15E-04                   | 2.80 |
| Agt     | alanine-glyoxylate aminotransferase                         | NM_007428    | 1.56E-05 | 5.57E-04                   | 2.60 |
| Zfand2a | zinc finger, AN1-type domain 2A                             | NM_133349    | 0.000777 | 7.02E-03                   | 2.54 |
| Trim72  | tripartite motif-containing 72                              | NM_001079932 | 2.21E-07 | 3.90E-05                   | 2.52 |

**Table S3. Proteolysis-related upregulated genes**

| Input   | Name                                           | Transcript   | p-value  | Adjusted p-value (q-value) | FC     |
|---------|------------------------------------------------|--------------|----------|----------------------------|--------|
| Timp1   | tissue inhibitor of metalloproteinase 1        | NM_011593    | 1.17E-05 | 4.56E-04                   | 28.02  |
| Timp1   | tissue inhibitor of metalloproteinase 1        | NM_001044384 | 0.000158 | 2.42E-03                   | 565.23 |
| Klk1    | kallikrein 1-related peptidase b1              | NM_010639    | 0.000169 | 2.52E-03                   | 389.04 |
| Perp    | PERP, TP53 apoptosis effector                  | NM_022032    | 2.63E-08 | 1.17E-05                   | 13.91  |
| Tnfaip3 | tumor necrosis factor, alpha-induced protein 3 | NM_009397    | 0.002631 | 1.73E-02                   | 4.39   |
| Tnfaip3 | tumor necrosis factor, alpha-induced protein 3 | NM_001166402 | 7.19E-05 | 1.46E-03                   | 7.26   |
| Cst6    | cystatin B                                     | NM_028623    | 6.68E-08 | 2.01E-05                   | 4.23   |
| Uchl1   | ubiquitin carboxy-terminal hydrolase L1        | NM_011670    | 9.62E-05 | 1.77E-03                   | 3.64   |
| Ctss    | cathepsin S                                    | NM_021281    | 0.000192 | 2.72E-03                   | 3.56   |
| Lgmn    | legumain                                       | NM_011175    | 1.17E-07 | 2.65E-05                   | 3.44   |
| Otub2   | OTU domain, ubiquitin aldehyde binding 2       | NR_033587    | 0.020306 | 7.51E-02                   | 3.24   |
| Hk1     | kallikrein 1                                   | NM_001146100 | 2.59E-05 | 7.55E-04                   | 3.20   |
| Casp4   | caspase 1                                      | NM_007609    | 0.000128 | 2.13E-03                   | 2.83   |
| Usp20   | ubiquitin specific peptidase 20                | NM_028846    | 2.07E-07 | 3.74E-05                   | 2.65   |
| Cpe     | carboxypeptidase E                             | NM_013494    | 4.48E-09 | 4.61E-06                   | 2.64   |
| Trp53   | transformation related protein 53              | NM_001127233 | 0.011323 | 4.98E-02                   | 2.59   |
| Tnip1   | TNFAIP3 interacting protein 1                  | NM_001199276 | 0.001174 | 9.50E-03                   | 2.57   |
| Atpif1  | ATPase inhibitory factor 1                     | NM_007512    | 4.58E-07 | 6.12E-05                   | 2.55   |

**Table S4. Protease-related upregulated genes**

| Input     | Name                                                         | Transcript   | p-value  | Adjusted p-value (q-value) | FC     |
|-----------|--------------------------------------------------------------|--------------|----------|----------------------------|--------|
| Timp1     | tissue inhibitor of metalloproteinase 1                      | NM_011593    | 1.17E-05 | 4.56E-04                   | 28.02  |
| Timp1     | tissue inhibitor of metalloproteinase 1                      | NM_001044384 | 0.000158 | 2.42E-03                   | 565.23 |
| Tnfaip3   | tumor necrosis factor, alpha-induced protein 3               | NM_009397    | 0.002631 | 1.73E-02                   | 4.39   |
| Tnfaip3   | tumor necrosis factor, alpha-induced protein 3               | NM_001166402 | 7.19E-05 | 1.46E-03                   | 7.26   |
| Park2     | Parkinson disease (autosomal recessive, juvenile) 2, parkin  | NM_016694    | 7.94E-10 | 1.52E-06                   | 6.33   |
| Cst6      | cystatin B                                                   | NM_028623    | 6.68E-08 | 2.01E-05                   | 4.23   |
| Panx1     | pannexin 1                                                   | NM_019482    | 4.14E-05 | 1.01E-03                   | 4.01   |
| Uchl1     | ubiquitin carboxy-terminal hydrolase L1                      | NM_011670    | 9.62E-05 | 1.77E-03                   | 3.64   |
| Otub2     | OTU domain, ubiquitin aldehyde binding 2                     | NR_033587    | 0.020306 | 7.51E-02                   | 3.24   |
| Anxa2     | annexin A2                                                   | NM_007585    | 7.25E-08 | 2.09E-05                   | 3.15   |
| Serpinb6a | serine (or cysteine) peptidase inhibitor, clade B, member 6a | NM_001164118 | 3.88E-07 | 5.63E-05                   | 2.48   |
| Serpinb6a | serine (or cysteine) peptidase inhibitor, clade B, member 6a | NM_009254    | 2.53E-07 | 4.25E-05                   | 3.11   |
| Serpinb6a | serine (or cysteine) peptidase inhibitor, clade B, member 6a | NM_001164117 | 7.02E-06 | 3.40E-04                   | 2.62   |
| Trp53     | transformation related protein 53                            | NM_001127233 | 0.011323 | 4.98E-02                   | 2.59   |
| Tnip1     | TNFAIP3 interacting protein 1                                | NM_001199276 | 0.001174 | 9.50E-03                   | 2.57   |

**Table S5. Peptidase-related upregulated genes**

| Input     | Name                                                            | Transcript   | p-value  | Adjusted p-value (q-value) | FC      |
|-----------|-----------------------------------------------------------------|--------------|----------|----------------------------|---------|
| Mt4       | protease, serine 21                                             | NM_008631    | 5.82E-12 | 6.89E-08                   | 9063.46 |
| Timp1     | tissue inhibitor of metalloproteinase 1                         | NM_011593    | 1.17E-05 | 4.56E-04                   | 28.02   |
| Timp1     | tissue inhibitor of metalloproteinase 1                         | NM_001044384 | 0.000158 | 2.42E-03                   | 565.23  |
| Fetub     | fetuin beta                                                     | NM_021564    | 0.001012 | 8.53E-03                   | 237.85  |
| Fetub     | fetuin beta                                                     | NM_001083904 | 0.000438 | 4.75E-03                   | 404.75  |
| Klk1      | kallikrein 1-related peptidase b1                               | NM_010639    | 0.000169 | 2.52E-03                   | 389.04  |
| Serpinb1a | serine (or cysteine) peptidase inhibitor, clade B, member 1a    | NM_025429    | 2.74E-09 | 3.35E-06                   | 18.61   |
| Perp      | PERP, TP53 apoptosis effector                                   | NM_022032    | 2.63E-08 | 1.17E-05                   | 13.91   |
| Tnfaip3   | tumor necrosis factor, alpha-induced protein 3                  | NM_009397    | 0.002631 | 1.73E-02                   | 4.39    |
| Tnfaip3   | tumor necrosis factor, alpha-induced protein 3                  | NM_001166402 | 7.19E-05 | 1.46E-03                   | 7.26    |
| Serpinb8  | serine (or cysteine) peptidase inhibitor, clade B, member 8     | NM_011459    | 4.97E-06 | 2.78E-04                   | 6.98    |
| Bok       | BCL2-related ovarian killer                                     | NM_016778    | 1.1E-06  | 1.04E-04                   | 5.80    |
| Arc       | nucleolar protein 3 (apoptosis repressor with CARD domain)      | NM_018790    | 0.004423 | 2.53E-02                   | 5.56    |
| Cst6      | cystatin B                                                      | NM_028623    | 6.68E-08 | 2.01E-05                   | 4.23    |
| Uchl1     | ubiquitin carboxy-terminal hydrolase L1                         | NM_011670    | 9.62E-05 | 1.77E-03                   | 3.64    |
| Serpina3n | serine (or cysteine) peptidase inhibitor, clade A, member 3C    | NM_009252    | 3.95E-08 | 1.42E-05                   | 3.62    |
| Ctss      | cathepsin S                                                     | NM_021281    | 0.000192 | 2.72E-03                   | 3.56    |
| Lgmn      | legumain                                                        | NM_011175    | 1.17E-07 | 2.65E-05                   | 3.44    |
| Serpina3m | serine (or cysteine) peptidase inhibitor, clade A, member 3M    | NM_009253    | 2.8E-05  | 7.94E-04                   | 3.36    |
| Otub2     | OTU domain, ubiquitin aldehyde binding 2                        | NR_033587    | 0.020306 | 7.51E-02                   | 3.24    |
| Hk1       | kallikrein 1                                                    | NM_001146100 | 2.59E-05 | 7.55E-04                   | 3.20    |
| Serpinb6a | serine (or cysteine) peptidase inhibitor, clade B, member 6a    | NM_001164118 | 3.88E-07 | 5.63E-05                   | 2.48    |
| Serpinb6a | serine (or cysteine) peptidase inhibitor, clade B, member 6a    | NM_009254    | 2.53E-07 | 4.25E-05                   | 3.11    |
| Serpinb6a | serine (or cysteine) peptidase inhibitor, clade B, member 6a    | NM_001164117 | 7.02E-06 | 3.40E-04                   | 2.62    |
| Casp4     | caspase 1                                                       | NM_007609    | 0.000128 | 2.13E-03                   | 2.83    |
| Arl6ip5   | ADP-ribosylation factor-like 6 interacting protein 5            | NM_022992    | 6.7E-07  | 7.59E-05                   | 2.81    |
| Usp20     | ubiquitin specific peptidase 20                                 | NM_028846    | 2.07E-07 | 3.74E-05                   | 2.65    |
| Cpe       | carboxypeptidase E                                              | NM_013494    | 4.48E-09 | 4.61E-06                   | 2.64    |
| Agt       | angiotensinogen (serpin peptidase inhibitor, clade A, member 8) | NM_007428    | 1.56E-05 | 5.57E-04                   | 2.60    |

**Table S6. Autophagy-related upregulated genes**

| Input    | Name                                                        | Transcript   | p-value  | Adjusted p-value (q-value) | FC     |
|----------|-------------------------------------------------------------|--------------|----------|----------------------------|--------|
| Mt3      | metallothionein 3                                           | NM_013603    | 3.03E-08 | 1.23E-05                   | 395.68 |
| Tnfaip3  | tumor necrosis factor, alpha-induced protein 3              | NM_009397    | 0.002631 | 1.73E-02                   | 4.39   |
| Tnfaip3  | tumor necrosis factor, alpha-induced protein 3              | NM_001166402 | 7.19E-05 | 1.46E-03                   | 7.26   |
| Park2    | Parkinson disease (autosomal recessive, juvenile) 2, parkin | NM_016694    | 7.94E-10 | 1.52E-06                   | 6.33   |
| Qsox1    | quiescin Q6 sulfhydryl oxidase 1                            | NM_001024945 | 1.42E-09 | 2.10E-06                   | 2.90   |
| Casp4    | caspase 1                                                   | NM_007609    | 0.000128 | 2.13E-03                   | 2.83   |
| Map1lc3a | microtubule-associated protein 1 light chain 3 alpha        | NM_025735    | 7.04E-07 | 7.71E-05                   | 2.59   |

**Table S7. Metabolome analysis of muscle biopsies from 3-month old WT and KO female mice; absolute concentration of 116 compounds.**

[illegible]

**Table S7 (continued). Metabolome analysis of muscle biopsies from 3-month old WT and KO female mice; absolute concentration of 116 compounds**

| ID     | HMT DB<br>Compound name | Concentration (nmol/g) |       |         |      | Comparative Analysis |                       |                    |                       |
|--------|-------------------------|------------------------|-------|---------|------|----------------------|-----------------------|--------------------|-----------------------|
|        |                         | Control                |       | Disease |      | Control vs Disease   |                       | Disease vs Control |                       |
|        |                         | Mean                   | S.D.  | Mean    | S.D. | Ratio <sup>¶</sup>   | p-value <sup>  </sup> | Ratio <sup>¶</sup> | p-value <sup>  </sup> |
| A_0061 | Fumaric acid            | 81                     | 20    | 118     | 10   | 0.7                  | 0.010 **              | 1.5                | 0.010 **              |
| A_0062 | Citric acid             | 114                    | 11    | 191     | 4.8  | 0.6                  | 3.0E-05 ***           | 1.7                | 3.0E-05 ***           |
| A_0063 | cis-Aconitic acid       | 0.05                   | N.A.  | 0.6     | 0.6  | 0.08                 | N.A.                  | 13                 | N.A.                  |
| A_0064 | Isocitric acid          | N.A.                   | N.A.  | N.A.    | N.A. | N.A.                 | N.A.                  | N.A.               | N.A.                  |
| C_0001 | Urea                    | 4,169                  | 303   | 5,184   | 784  | 0.8                  | 0.014 *               | 1.2                | 0.014 *               |
| C_0002 | Gly                     | 2,658                  | 549   | 2,324   | 206  | 1.1                  | 0.254                 | 0.9                | 0.254                 |
| C_0003 | Putrescine              | N.A.                   | N.A.  | N.A.    | N.A. | N.A.                 | N.A.                  | N.A.               | N.A.                  |
| C_0004 | Ala                     | 2,209                  | 354   | 3,113   | 233  | 0.7                  | 0.002 **              | 1.4                | 0.002 **              |
| C_0005 | β-Ala                   | 1.9                    | 2.6   | 1.4     | N.A. | 1.3                  | N.A.                  | 0.8                | N.A.                  |
| C_0006 | Sarcosine               | 3.0                    | 2.5   | 4.9     | N.A. | 0.6                  | N.A.                  | 1.7                | N.A.                  |
| C_0007 | γ-Aminobutyric acid     | N.A.                   | N.A.  | N.A.    | N.A. | N.A.                 | N.A.                  | N.A.               | N.A.                  |
| C_0008 | N,N-Dimethylglycine     | N.A.                   | N.A.  | N.A.    | N.A. | N.A.                 | N.A.                  | N.A.               | N.A.                  |
| C_0009 | Choline                 | N.A.                   | N.A.  | N.A.    | N.A. | N.A.                 | N.A.                  | N.A.               | N.A.                  |
| C_0010 | Ser                     | 345                    | 76    | 499     | 44   | 0.7                  | 0.007 **              | 1.4                | 0.007 **              |
| C_0011 | Carnosine               | 882                    | 144   | 764     | 48   | 1.2                  | 0.142                 | 0.9                | 0.142                 |
| C_0012 | Creatinine              | 71                     | 3.4   | 72      | 5.9  | 1.0                  | 0.815                 | 1.0                | 0.815                 |
| C_0013 | Pro                     | N.A.                   | N.A.  | N.A.    | N.A. | N.A.                 | N.A.                  | N.A.               | N.A.                  |
| C_0014 | Betaine                 | N.A.                   | N.A.  | N.A.    | N.A. | N.A.                 | N.A.                  | N.A.               | N.A.                  |
| C_0015 | Val                     | 108                    | 45    | 81      | 31   | 1.3                  | 0.294                 | 0.8                | 0.294                 |
| C_0016 | Homoserine              | N.A.                   | N.A.  | N.A.    | N.A. | N.A.                 | N.A.                  | N.A.               | N.A.                  |
| C_0017 | Thr                     | 270                    | 55    | 359     | 29   | 0.8                  | 0.017 *               | 1.3                | 0.017 *               |
| C_0018 | Betaine aldehyde        | N.A.                   | N.A.  | N.A.    | N.A. | N.A.                 | N.A.                  | N.A.               | N.A.                  |
| C_0019 | Cys                     | N.A.                   | N.A.  | N.A.    | N.A. | N.A.                 | N.A.                  | N.A.               | N.A.                  |
| C_0020 | Hydroxyproline          | 285                    | 51    | 188     | 21   | 1.4                  | 0.024 *               | 0.7                | 0.024 *               |
| C_0021 | Creatine                | 21,035                 | 1,846 | 18,204  | 875  | 1.2                  | 0.023 *               | 0.9                | 0.023 *               |
| C_0022 | Leu                     | 120                    | 25    | 126     | 16   | 0.9                  | 0.612                 | 1.1                | 0.612                 |
| C_0023 | Ile                     | 45                     | 18    | 44      | 8.6  | 1.0                  | 0.946                 | 1.0                | 0.946                 |
| C_0024 | Asn                     | 28                     | 15    | 40      | 13   | 0.7                  | 0.183                 | 1.4                | 0.183                 |
| C_0025 | Ornithine               | 41                     | 5.8   | 55      | 5.6  | 0.7                  | 0.003 **              | 1.3                | 0.003 **              |
| C_0026 | Asp                     | 179                    | 35    | 275     | 7.9  | 0.6                  | 0.003 **              | 1.5                | 0.003 **              |
| C_0027 | Homocysteine            | N.A.                   | N.A.  | N.A.    | N.A. | N.A.                 | N.A.                  | N.A.               | N.A.                  |
| C_0028 | Adenine                 | 4.4                    | 0.9   | 4.8     | 0.9  | 0.9                  | 0.478                 | 1.1                | 0.478                 |
| C_0029 | Hypoxanthine            | N.A.                   | N.A.  | N.A.    | N.A. | N.A.                 | N.A.                  | N.A.               | N.A.                  |
| C_0030 | Spermidine              | 2.7                    | 0.5   | 4.8     | 1.4  | 0.6                  | 0.008 **              | 1.7                | 0.008 **              |
| C_0031 | Gln                     | 2,067                  | 231   | 2,442   | 125  | 0.8                  | 0.018 *               | 1.2                | 0.018 *               |
| C_0032 | Lys                     | 1,679                  | 424   | 3,056   | 679  | 0.5                  | 0.002 **              | 1.8                | 0.002 **              |
| C_0033 | Glu                     | 934                    | 190   | 857     | 127  | 1.1                  | 0.460                 | 0.9                | 0.460                 |
| C_0034 | Met                     | 89                     | 12    | 92      | 8.1  | 1.0                  | 0.589                 | 1.0                | 0.589                 |
| C_0035 | Guanine                 | N.A.                   | N.A.  | N.A.    | N.A. | N.A.                 | N.A.                  | N.A.               | N.A.                  |
| C_0036 | His                     | 118                    | 25    | 159     | 9.7  | 0.7                  | 0.018 *               | 1.3                | 0.018 *               |
| C_0037 | Carnitine               | 205                    | 19    | 385     | 33   | 0.5                  | 4.2E-07 ***           | 1.9                | 4.2E-07 ***           |
| C_0038 | Phe                     | 80                     | 9.4   | 82      | 4.2  | 1.0                  | 0.668                 | 1.0                | 0.668                 |
| C_0039 | Arg                     | 692                    | 139   | 790     | 189  | 0.9                  | 0.326                 | 1.1                | 0.326                 |
| C_0040 | Citrulline              | 105                    | 16    | 145     | 15   | 0.7                  | 0.002 **              | 1.4                | 0.002 **              |
| C_0041 | Tyr                     | 75                     | 8.0   | 78      | 8.6  | 1.0                  | 0.602                 | 1.0                | 0.602                 |
| C_0042 | S-Adenosylhomocysteine  | N.A.                   | N.A.  | N.A.    | N.A. | N.A.                 | N.A.                  | N.A.               | N.A.                  |
| C_0043 | Spermine                | N.A.                   | N.A.  | N.A.    | N.A. | N.A.                 | N.A.                  | N.A.               | N.A.                  |
| C_0044 | Trp                     | 29                     | 2.5   | 33      | 3.3  | 0.9                  | 0.083                 | 1.1                | 0.083                 |
| C_0045 | Cystathionine           | N.A.                   | N.A.  | N.A.    | N.A. | N.A.                 | N.A.                  | N.A.               | N.A.                  |
| C_0046 | Adenosine               | 12                     | 1.6   | 12      | 1.4  | 1.0                  | 0.760                 | 1.0                | 0.760                 |
| C_0047 | Inosine                 | 5.2                    | N.A.  | 6.5     | N.A. | 0.8                  | N.A.                  | 1.2                | N.A.                  |
| C_0048 | Guanosine               | N.A.                   | N.A.  | N.A.    | N.A. | N.A.                 | N.A.                  | N.A.               | N.A.                  |
| C_0049 | Argininosuccinic acid   | 11                     | N.A.  | 13      | 2.9  | 0.9                  | N.A.                  | 1.1                | N.A.                  |
| C_0050 | Glutathione (GSSG)      | 47                     | 21    | 59      | 4.0  | 0.8                  | 0.254                 | 1.3                | 0.254                 |
| C_0051 | Glutathione (GSH)       | 552                    | 68    | 868     | 93   | 0.6                  | 4.8E-05 ***           | 1.6                | 4.8E-05 ***           |
| C_0052 | S-Adosylmethionine      | 30                     | 2.0   | 35      | 2.2  | 0.8                  | 0.002 **              | 1.2                | 0.002 **              |

ID represents analysis mode and number. 'C' and 'A' showed cation and anion modes, respectively.

N.D. (Not Detected): The target peak or metabolite was below detection limits.

N.A. (Not Available): The calculation was impossible because of insufficiency of the data.

<sup>¶</sup> The ratio is computed by using averaged detection values. The latter was used as denominator.

<sup>||</sup> The p-value is computed by Welch's t-test. (\*<0.05, \*\*<0.01, \*\*\*<0.001)

The data are sorted by ID in ascending order.

**Table S7A. Metabolome analysis of muscle biopsies from 5-6-month-old WT and KO male mice; absolute concentration of 116 compounds.**

| ID     | Compound name              | Concentration (nmol/g) |       |       |      | Comparative Analysis |             |
|--------|----------------------------|------------------------|-------|-------|------|----------------------|-------------|
|        |                            | WT                     |       | KO    |      | KO vs WT             |             |
|        |                            | Mean                   | S.D.  | Mean  | S.D. |                      |             |
| A_0001 | NAD <sup>+</sup>           | 441                    | 14    | 446   | 13   | 1.0                  | 0.579       |
| A_0002 | cAMP                       | 0.6                    | 0.10  | 0.7   | 0.09 | 1.0                  | 0.713       |
| A_0003 | cGMP                       | N.A.                   | N.A.  | N.A.  | N.A. | N.A.                 |             |
| A_0004 | NADH                       | 11                     | 0.4   | 12    | 0.6  | 1.1                  | 0.009 **    |
| A_0005 | Xanthine                   | 1.1                    | 0.4   | 2.4   | 0.6  | 2.2                  | 0.001 **    |
| A_0006 | ADP-ribose                 | 6.7                    | 3.6   | 6.1   | 1.2  | 0.9                  | 0.769       |
| A_0007 | Mevalonic acid             | N.A.                   | N.A.  | N.A.  | N.A. | N.A.                 | N.A.        |
| A_0008 | UDP-glucose                | 12                     | 1.1   | 20    | 1.0  | 1.6                  | 9.2E-07 *** |
| A_0009 | Uric acid                  | 3.0                    | 0.9   | 7.5   | 0.9  | 2.5                  | 2.5E-05 *** |
| A_0010 | NADP <sup>+</sup>          | 8.0                    | 0.7   | 13    | 0.5  | 1.6                  | 2.5E-06 *** |
| A_0011 | IMP                        | 190                    | 81    | 75    | 15   | 0.4                  | 0.033 *     |
| A_0012 | Sedoheptulose 7-phosphate  | N.A.                   | N.A.  | N.A.  | N.A. | N.A.                 | N.A.        |
| A_0013 | Glucose 6-phosphate        | 2,690                  | 182   | 1,866 | 76   | 0.7                  | 2.1E-04 *** |
| A_0014 | Fructose 6-phosphate       | 1,020                  | 60    | 686   | 39   | 0.7                  | 2.1E-05 *** |
| A_0015 | Fructose 1-phosphate       | N.A.                   | N.A.  | N.A.  | N.A. | N.A.                 | N.A.        |
| A_0016 | Galactose 1-phosphate      | 5.3                    | 3.8   | 9.0   | 1.5  | 1.7                  | 0.094       |
| A_0017 | Glucose 1-phosphate        | 337                    | 43    | 195   | 15   | 0.6                  | 0.001 **    |
| A_0018 | Acetoacetyl CoA            | N.A.                   | N.A.  | N.A.  | N.A. | N.A.                 | N.A.        |
| A_0019 | Acetyl CoA                 | 0.7                    | 0.14  | 1.0   | 0.2  | 1.4                  | 0.019 *     |
| A_0020 | Folic acid                 | N.A.                   | N.A.  | N.A.  | N.A. | N.A.                 | N.A.        |
| A_0021 | Ribose 5-phosphate         | 1.3                    | 0.8   | 2.2   | 0.6  | 1.6                  | 0.095       |
| A_0022 | CoA                        | 4.4                    | 0.3   | 7.5   | 0.6  | 1.7                  | 8.1E-07 *** |
| A_0023 | Ribose 1-phosphate         | 3.1                    | 0.7   | 4.6   | 1.6  | 1.5                  | 0.069       |
| A_0024 | Ribulose 5-phosphate       | 4.7                    | 1.4   | 7.6   | 2.8  | 1.6                  | 0.047 *     |
| A_0025 | Xylulose 5-phosphate       | N.A.                   | N.A.  | N.A.  | N.A. | N.A.                 | N.A.        |
| A_0026 | Erythrose 4-phosphate      | N.A.                   | N.A.  | N.A.  | N.A. | N.A.                 | N.A.        |
| A_0027 | HMG CoA                    | 0.5                    | N.A.  | 0.5   | 0.03 | 1.0                  | N.A.        |
| A_0028 | Glyceraldehyde 3-phosphate | 3.2                    | 2.6   | 2.3   | 2.4  | 0.7                  | 0.649       |
| A_0029 | NADPH                      | 8.4                    | 0.6   | 5.8   | 0.6  | 0.7                  | 3.0E-05 *** |
| A_0030 | Malonyl CoA                | 1.1                    | 0.10  | 1.4   | 0.14 | 1.3                  | 0.002 **    |
| A_0031 | Phosphocreatine            | 2,265                  | 140   | 2,143 | 226  | 0.9                  | 0.280       |
| A_0032 | XMP                        | 0.14                   | N.A.  | 0.3   | 0.06 | 2.3                  | N.A.        |
| A_0033 | Dihydroxyacetone phosphate | 216                    | 47    | 193   | 38   | 0.9                  | 0.395       |
| A_0034 | Adenylosuccinic acid       | 1.4                    | 0.3   | 1.7   | 0.3  | 1.2                  | 0.136       |
| A_0035 | Fructose 1,6-diphosphate   | 417                    | 102   | 214   | 33   | 0.5                  | 0.009 **    |
| A_0036 | 6-Phosphogluconic acid     | 2.5                    | 0.5   | 1.4   | 0.7  | 0.6                  | 0.010 **    |
| A_0037 | N-Carbamoylaspartic acid   | 0.2                    | 0.07  | 0.2   | 0.07 | 1.1                  | 0.671       |
| A_0038 | PRPP                       | 29                     | 5.7   | 19    | 4.8  | 0.6                  | 0.011 *     |
| A_0039 | 2-Phosphoglyceric acid     | 3.6                    | 0.3   | 2.2   | 0.3  | 0.6                  | 8.0E-05 *** |
| A_0040 | 2,3-Diphosphoglyceric acid | 2.4                    | 1.3   | 2.1   | 0.4  | 0.9                  | 0.588       |
| A_0041 | 3-Phosphoglyceric acid     | 32                     | 3.0   | 19    | 2.0  | 0.6                  | 9.1E-05 *** |
| A_0042 | Phosphoenolpyruvic acid    | 4.8                    | 0.6   | 1.0   | 0.8  | 0.2                  | 6.2E-06 *** |
| A_0043 | GMP                        | 3.1                    | 0.4   | 3.2   | 0.4  | 1.0                  | 0.709       |
| A_0044 | AMP                        | 1.4                    | 0.8   | 0.9   | 0.3  | 0.7                  | 0.272       |
| A_0045 | 2-Oxoisovaleric acid       | 19                     | 1.7   | 12    | 0.6  | 0.6                  | 3.5E-04 *** |
| A_0046 | GDP                        | 3.5                    | 0.5   | 3.9   | 0.6  | 1.1                  | 0.168       |
| A_0047 | Lactic acid                | 12,142                 | 1,398 | 8,113 | 545  | 0.7                  | 0.002 **    |
| A_0048 | ADP                        | 85                     | 9.1   | 96    | 9.3  | 1.1                  | 0.066       |
| A_0049 | GTP                        | 120                    | 6.4   | 175   | 5.3  | 1.5                  | 4.8E-07 *** |
| A_0050 | Glyoxylate                 | N.A.                   | N.A.  | N.A.  | N.A. | N.A.                 | N.A.        |
| A_0051 | ATP                        | 7,273                  | 196   | 7,158 | 212  | 1.0                  | 0.357       |
| A_0052 | Glycerol 3-phosphate       | 504                    | 76    | 492   | 34   | 1.0                  | 0.764       |
| A_0053 | Glycolic acid              | N.A.                   | N.A.  | N.A.  | N.A. | N.A.                 | N.A.        |
| A_0054 | Pyruvic acid               | 195                    | 12    | 151   | 16   | 0.8                  | 2.9E-04 *** |
| A_0055 | N-Acetylglutamic acid      | N.A.                   | N.A.  | 0.07  | 0.09 | 1<                   | N.A.        |
| A_0056 | 2-Hydroxyglutaric acid     | 26                     | 1.5   | 8.3   | 1.0  | 0.3                  | 1.8E-07 *** |
| A_0057 | Carbamoylphosphate         | N.A.                   | N.A.  | N.A.  | N.A. | N.A.                 | N.A.        |
| A_0058 | Succinic acid              | 206                    | 51    | 265   | 34   | 1.3                  | 0.061       |
| A_0059 | Malic acid                 | 125                    | 27    | 202   | 19   | 1.6                  | 0.001 **    |
| A_0060 | 2-Oxoglutaric acid         | N.A.                   | N.A.  | N.A.  | N.A. | N.A.                 | N.A.        |

**Table S7A (continued). Metabolome analysis of muscle biopsies from 5-6-month-old WT and KO male mice; absolute concentration of 116 compounds.**

| ID     | HMT DB<br>Compound name | Concentration (nmol/g) |      |        |      | Comparative Analysis |             |
|--------|-------------------------|------------------------|------|--------|------|----------------------|-------------|
|        |                         | WT                     |      | KO     |      | KO<br>vs<br>WT       |             |
|        |                         | Mean                   | S.D. | Mean   | S.D. |                      |             |
| A_0061 | Fumaric acid            | 38                     | 16   | 74     | 13   | 1.9                  | 0.004 **    |
| A_0062 | Citric acid             | 209                    | 17   | 240    | 18   | 1.1                  | 0.013 *     |
| A_0063 | cis-Aconitic acid       | 0.6                    | 0.4  | 1.0    | 0.2  | 1.8                  | 0.048 *     |
| A_0064 | Isocitric acid          | N.A.                   | N.A. | N.A.   | N.A. | N.A.                 | N.A.        |
| C_0001 | Urea                    | 6,895                  | 500  | 6,038  | 850  | 0.9                  | 0.054       |
| C_0002 | Gly                     | 3,117                  | 282  | 2,903  | 232  | 0.9                  | 0.204       |
| C_0003 | Putrescine              | N.A.                   | N.A. | N.A.   | N.A. | N.A.                 | N.A.        |
| C_0004 | β-Ala                   | 77                     | 15   | 30     | 3.2  | 0.4                  | 0.002 **    |
| C_0005 | Sarcosine               | 2.1                    | 0.8  | 2.2    | 1.8  | 1.1                  | 0.883       |
| C_0006 | Ala                     | 2,534                  | 247  | 3,380  | 328  | 1.3                  | 4.8E-04 *** |
| C_0007 | γ-Aminobutyric acid     | N.A.                   | N.A. | N.A.   | N.A. | N.A.                 | N.A.        |
| C_0008 | N,N-Dimethylglycine     | N.A.                   | N.A. | N.A.   | N.A. | N.A.                 | N.A.        |
| C_0009 | Choline                 | N.A.                   | N.A. | N.A.   | N.A. | N.A.                 | N.A.        |
| C_0010 | Ser                     | 273                    | 44   | 436    | 48   | 1.6                  | 1.7E-04 *** |
| C_0011 | Carnosine               | 4,361                  | 300  | 1,570  | 192  | 0.4                  | 1.0E-06 *** |
| C_0012 | Creatinine              | 79                     | 4.9  | 53     | 3.0  | 0.7                  | 4.1E-05 *** |
| C_0013 | Pro                     | N.A.                   | N.A. | N.A.   | N.A. | N.A.                 | N.A.        |
| C_0014 | Betaine                 | N.A.                   | N.A. | N.A.   | N.A. | N.A.                 | N.A.        |
| C_0015 | Val                     | 93                     | 13   | 107    | 40   | 1.1                  | 0.429       |
| C_0016 | Thr                     | 231                    | 17   | 316    | 37   | 1.4                  | 4.7E-04 *** |
| C_0017 | Homoserine              | 2.8                    | N.A. | 3.4    | 0.3  | 1.2                  | N.A.        |
| C_0018 | Betaine aldehyde        | N.A.                   | N.A. | N.A.   | N.A. | N.A.                 | N.A.        |
| C_0019 | Cys                     | N.A.                   | N.A. | N.A.   | N.A. | N.A.                 | N.A.        |
| C_0020 | Hydroxyproline          | 476                    | 91   | 258    | 48   | 0.5                  | 0.003 **    |
| C_0021 | Creatine                | 16,950                 | 744  | 15,621 | 953  | 0.9                  | 0.022 *     |
| C_0022 | Leu                     | 102                    | 6.4  | 157    | 19   | 1.5                  | 1.1E-04 *** |
| C_0023 | Ile                     | 35                     | 2.0  | 58     | 11   | 1.6                  | 0.002 **    |
| C_0024 | Asn                     | 26                     | 6.3  | 55     | 14   | 2.1                  | 8.4E-04 *** |
| C_0025 | Ornithine               | 4.5                    | 2.4  | 34     | 11   | 7.5                  | 3.0E-04 *** |
| C_0026 | Asp                     | 104                    | 12   | 272    | 19   | 2.6                  | 4.9E-09 *** |
| C_0027 | Homocysteine            | N.A.                   | N.A. | N.A.   | N.A. | N.A.                 | N.A.        |
| C_0028 | Adenine                 | N.A.                   | N.A. | N.A.   | N.A. | N.A.                 | N.A.        |
| C_0029 | Hypoxanthine            | N.A.                   | N.A. | N.A.   | N.A. | N.A.                 | N.A.        |
| C_0030 | Spermidine              | 9.8                    | 0.6  | 10     | 0.9  | 1.0                  | 0.581       |
| C_0031 | Gln                     | 1,618                  | 137  | 2,180  | 101  | 1.3                  | 1.1E-04 *** |
| C_0032 | Lys                     | 400                    | 91   | 1,431  | 100  | 3.6                  | 1.2E-08 *** |
| C_0033 | Glu                     | 681                    | 164  | 1,150  | 86   | 1.7                  | 0.001 **    |
| C_0034 | Met                     | 55                     | 5.4  | 63     | 11   | 1.1                  | 0.135       |
| C_0035 | Guanine                 | N.A.                   | N.A. | N.A.   | N.A. | N.A.                 | N.A.        |
| C_0036 | His                     | 131                    | 12   | 135    | 8.0  | 1.0                  | 0.523       |
| C_0037 | Carnitine               | 235                    | 15   | 360    | 20   | 1.5                  | 2.3E-07 *** |
| C_0038 | Phe                     | 73                     | 7.5  | 74     | 8.0  | 1.0                  | 0.863       |
| C_0039 | Arg                     | 186                    | 45   | 418    | 34   | 2.2                  | 2.4E-05 *** |
| C_0040 | Citrulline              | 102                    | 8.9  | 137    | 11   | 1.3                  | 1.3E-04 *** |
| C_0041 | Tyr                     | 105                    | 24   | 71     | 11   | 0.7                  | 0.032 *     |
| C_0042 | S-Adenosylhomocysteine  | 4.1                    | 0.6  | 4.3    | 0.5  | 1.1                  | 0.424       |
| C_0043 | Spermine                | N.A.                   | N.A. | N.A.   | N.A. | N.A.                 | N.A.        |
| C_0044 | Trp                     | 26                     | 2.3  | 22     | 1.8  | 0.9                  | 0.016 *     |
| C_0045 | Cystathionine           | N.A.                   | N.A. | N.A.   | N.A. | N.A.                 | N.A.        |
| C_0046 | Adenosine               | 1.7                    | 2.0  | 5.4    | 3.5  | 3.2                  | 0.077       |
| C_0047 | Inosine                 | 9.4                    | 2.6  | 20     | 4.5  | 2.2                  | 3.6E-04 *** |
| C_0048 | Guanosine               | N.A.                   | N.A. | 1.6    | 0.7  | 1<                   | N.A.        |
| C_0049 | Argininosuccinic acid   | 3.6                    | N.A. | 7.4    | 0.3  | 2.1                  | N.A.        |
| C_0050 | Glutathione (GSSG)      | 92                     | 6.2  | 92     | 13   | 1.0                  | 0.952       |
| C_0051 | Glutathione (GSH)       | 875                    | 78   | 1,569  | 65   | 1.8                  | 3.1E-07 *** |
| C_0052 | S-Adenosylmethionine    | 14                     | 0.8  | 24     | 2.2  | 1.7                  | 5.3E-06 *** |

ID consists of analysis mode and number. 'C' and 'A' showed cation and anion modes, respectively.

N.D. (Not Detected): The target peak or metabolite was below detection limits.

N.A. (Not Available): The calculation was impossible because of insufficiency of the data.

¶ The ratio is computed by using averaged detection values. The latter was used as denominator.

|| The p-value is computed by Welch's t-test. (\*<0.05, \*\*<0.01, \*\*\*<0.001)

The data are sorted by ID in ascending order.

**Table S8. The effect of ERT on glycogen levels ( $\mu\text{g}$  glucose/hr/mg protein) in KO and DKO strains.**

| Genotype | Tissue  | Untreated              | Treated               | % Reduction* |
|----------|---------|------------------------|-----------------------|--------------|
| KO       | Gastroc | $44.2 \pm 12.9$ (n=7)  | $28.0 \pm 20.3$ (n=6) | 41           |
|          | Quad    | $69.0 \pm 34.1$ (n=7)  | $25.9 \pm 6.6$ (n=6)  | 67           |
|          | Heart   | $153.5 \pm 41.2$ (n=2) | $14.2 \pm 10.0$ (n=2) | 93           |
| DKO      | Gastroc | $19.8 \pm 19.2$ (n=5)  | $5.0 \pm 6.8$ (n=6)   | 98           |
|          | Quad    | $27.7 \pm 27.6$ (n=5)  | $5.5 \pm 10.5$ (n=9)  | 98           |
|          | Heart   | $165.0 \pm 31.8$ (n=2) | $7.9 \pm 8.1$ (n=2)   | 98           |

Each value is the mean  $\pm$  SD from the indicated number of animals. The WT levels of glycogen in gastrocnemius/quadiceps of 8.5-month-old mice are  $3.6 \pm 3.0$   $\mu\text{g}$  glucose/hr/mg protein. \*The amount of residual glycogen (minus the WT level) in treated animals was compared to the level of glycogen in the respective tissue of KO mice.
